# Supplementary material for: Real-time prediction of cell division timing in developing zebrafish embryo
Source: PubMed Central journal article supplement (PMC5011986; doi:10.1038/srep32962), 2016-09-06
Supplement: srep32962-s1.pdf [file srep32962-s1.pdf]

Supplementary Information for

**Real-time prediction of cell division timing in developing zebrafish embryo**

Satoshi Kozawa<sup>1, 2, \*</sup>, Takashi Akanuma<sup>1, 2, \*</sup>, Tetsuo Sato<sup>1, 2, 3</sup>, Yasuomi D. Sato<sup>1, 2</sup>, Kazushi Ikeda<sup>1, 2, 3, ¶</sup>, Thomas N. Sato<sup>1, 2, 4, 5, ¶</sup>

\*These two authors contributed equally to this work

¶Corresponding Authors.

Email: island1005@gmail.com

**This PDF file includes**

Supplementary Figures 1 – 3

Supplementary Table 1

Supplementary Movie 1 Legends

Supplementary Figure

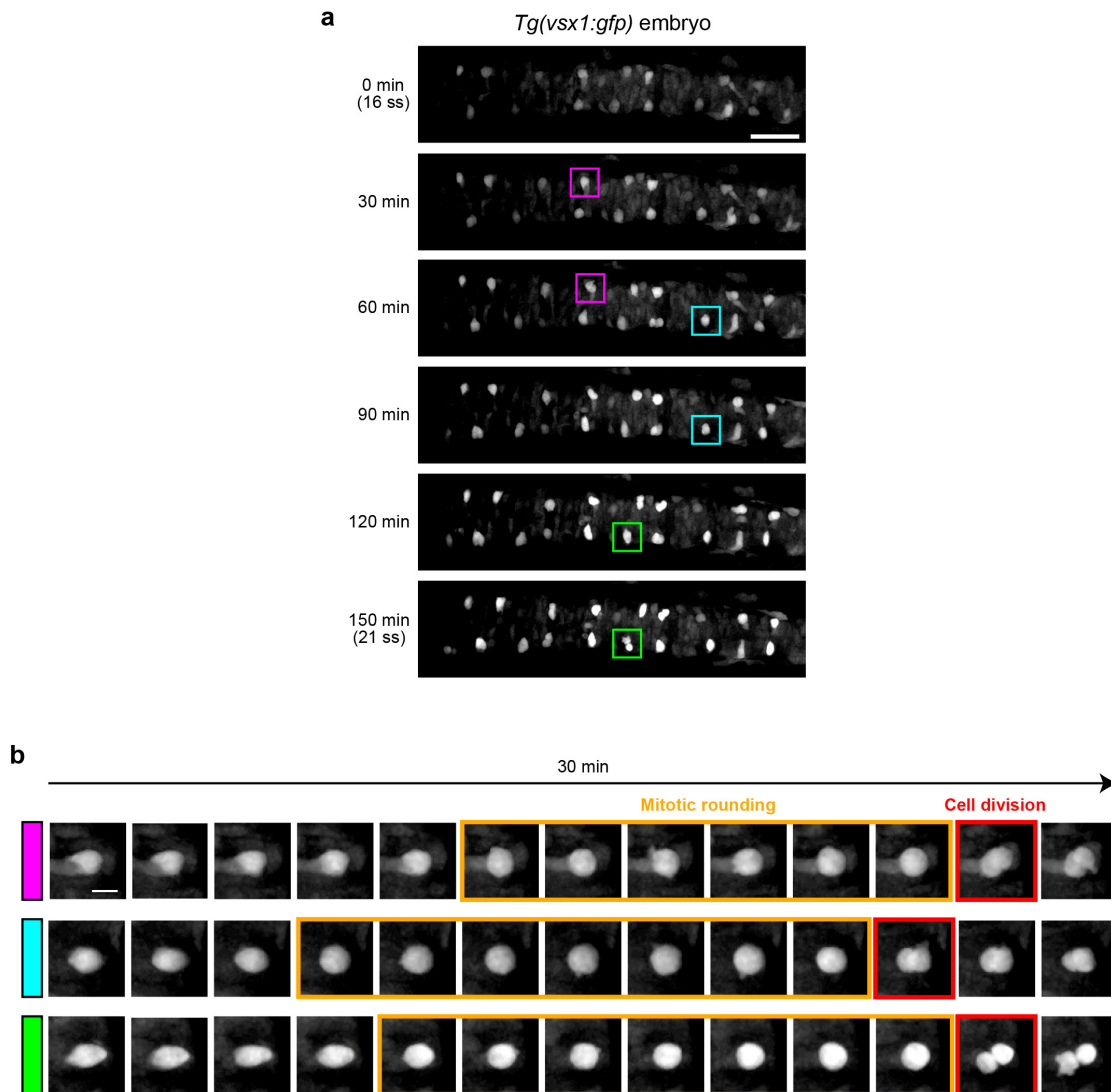

**Supplementary Figure 1. Behavior and dynamical shape changes of V2 cells.**

(a) Time-lapse images of GFP<sup>+</sup> V2 cells from the 16-somite stage (0 min) until the 21-somite stage (150 min). Shown are dorsal views of the embryo. Anterior side of the embryo is on the left. Time interval = 30 min. Cells boxed by the colored outlines are those shown in (b). Scale bar, 50  $\mu$ m. (b) Successive shape changes of individual V2 cells. The cells boxed by the colored outlines in (a) are shown. Apical side is on the left. Mitotic rounding (boxes outlined by orange outlines) and cell-division (boxes outlined by red outlines) phases are indicated. Time interval = 2.5 min. Scale bar, 10  $\mu$ m.

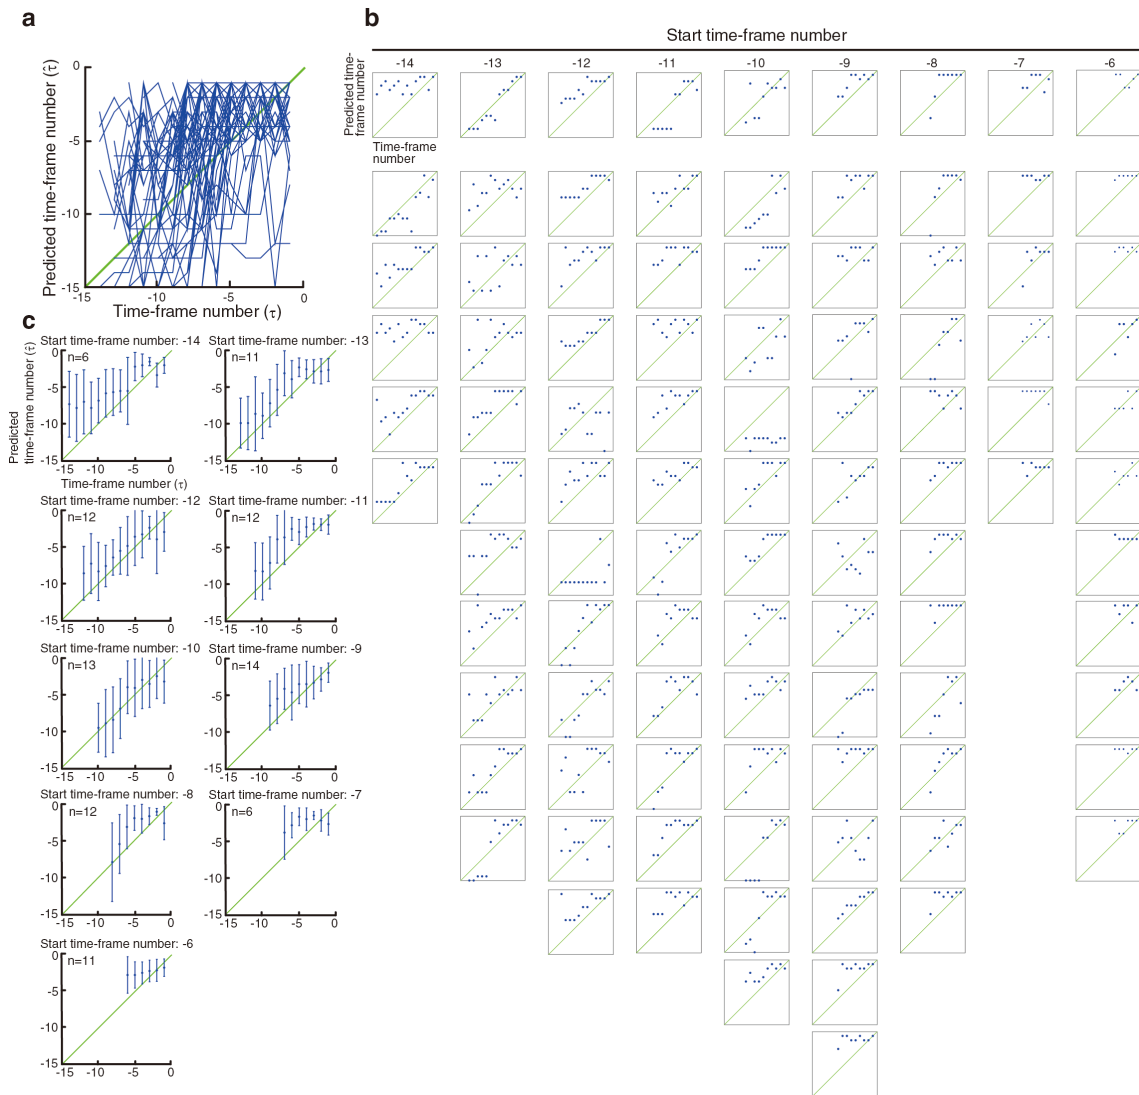

**Supplementary Figure 2. Prediction of the division-timing by MLE.**

(a) Prediction of the division-timing of 95 individual V2 cells. Each line represents the prediction of individual cells. (b) Predictions of each V2 cell are separately shown as dot plot according to their start-point of observations. Each dot in each plot represents the prediction at each time-point. (c) Compilation of the predictions according to their start-point of observations. Average (blue dot) and standard deviation (blue line) are shown for each time-point. Diagonal line (green) represents the perfect prediction (i.e. the actual division-timing).

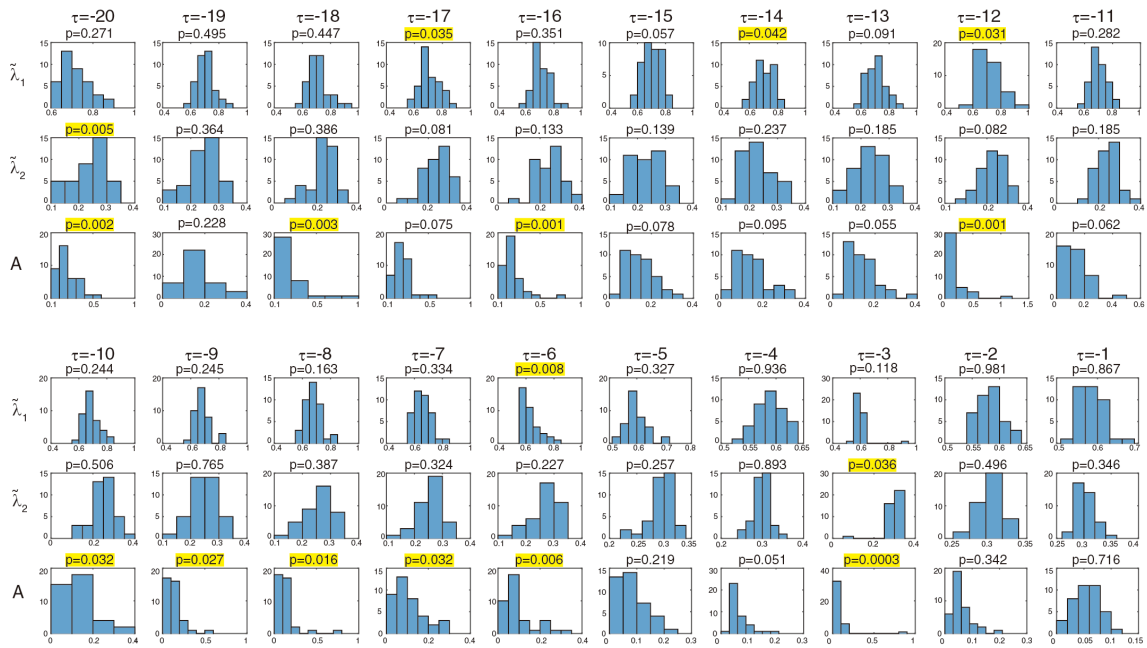

**Supplementary Figure 3. Distribution of each shape feature at each time frame.**

Incidence of each shape feature,  $\tilde{\lambda}_1, \tilde{\lambda}_2, A$ , is plotted for each time frame ( $\tau$ ). Fitting to Gaussian distribution is statistically determined and shown as p value at the top of each bar graph. p values are calculated by Kolmogorov-Smirnov test.  $p < 0.05$  is regarded as non-Gaussian and highlighted by yellow color background.

Supplementary Table 1: Distinction between cells at  $\tau < -15$  and those at  $\tau \geq -15$  by k-NN algorithm.

|              |                 | Predicted class |                 |
|--------------|-----------------|-----------------|-----------------|
|              |                 | $\tau < -15$    | $\tau \geq -15$ |
| Actual class | $\tau < -15$    | 0.4256          | 0.0744          |
|              | $\tau \geq -15$ | 0.1256          | 0.3744          |

## Supplementary Movie Legends

### **Supplementary Movie 1. Time-lapse movie of dynamical shape changes of V2 cells in *Tg(vsx1: gfp)* embryo.**

This movie shows dynamical shape changes of V2 cells in the trunk spinal cord region of *Tg(vsx1:GFP)* zebrafish embryo. All V2 cells divide once. Shown is dorsal view of the embryo with the anterior side on the left. This movie corresponds to Supplementary Figure 1a.

Time interval = 2.5 min.
